# Supplementary material for: A general framework for multilingual text mining using self-organizing maps
Source: Royal Society of Chemistry journal article supplement (doi:10.1039/d3nr05974j), 2007-02-12
Supplement: d3nr05974j1.pdf [file d3nr05974j1.pdf]

**From sensing the interaction to controlling the interaction: a novel  
approach to biological transistors for specific and label-free  
immunosensing**

Soumadri Samanta<sup>1</sup>, Vinay S. Tiwari<sup>2</sup>, Sumesh Sadhujan<sup>3</sup>, Sherina Harilal<sup>3</sup>, Avital Eisenberg-Lerner<sup>5</sup>, Ziv Rotfogel<sup>5,6</sup>, Evgeny Pikhay<sup>4</sup>, Ruth Shima-Edelstein<sup>4</sup>, Doron Greental<sup>4</sup>, Muhammad Y. Bashouti<sup>3,9</sup>, Barak Akabayov<sup>2</sup>, Izhar Ron<sup>1</sup>, Yakov Roizin<sup>4</sup>, Offer Erez<sup>7,8</sup>, Gil Shalev<sup>1,9\*</sup>

<sup>1</sup> School of Electrical Engineering, Ben-Gurion University of the Negev, Israel

<sup>2</sup>Department of Chemistry and Data Science Research Center, Ben-Gurion University of the Negev, 8410501, Beer-Sheva, Israel

<sup>3</sup>Department of Solar Energy and Environmental Physics, Swiss Institute for Dryland Environmental and Energy Research, J. Blaustein Institutes for Desert Research, Ben-Gurion University of the Negev, Midreshet Ben-Gurion 8499000, Israel

<sup>4</sup>Tower Semiconductor, PO Box 619, Migdal Haemek, Israel

<sup>5</sup> Ophthalmology Research Laboratory, Kaplan Medical Center, Rehovot, Israel

<sup>6</sup> Faculty of Medicine, Hadassah Medical School, The Hebrew University of Jerusalem, Jerusalem, Israel.

<sup>7</sup>Department of obstetrics and Gynecology Soroka University Medical Center, School of Medicine, Ben Gurion University of the Negev, Beer Sheva, Israel.

<sup>8</sup>Department of Obstetrics and Gynecology, School; of Medicine, Wayne State University, Detroit, MI, USA

<sup>9</sup>The Ilse-Katz Institute for Nanoscale Science and Technology, Ben-Gurion University of the Negev,  
POB 653, Beer-Sheva 8410501, Israel

\* Corresponding author.

E-mail address: glshalev@bgu.ac.il

## **Supplementary information**

### **SII: biofunctionalization and characterization of Si/SiO<sub>2</sub> samples and MNC devices**

Figure SIIa illustrates the main steps towards sensing area biofunctionalization with anti-AFP antibodies <sup>1</sup>. In short, the Si/SiO<sub>2</sub> sensing area is activated with piranha followed by surface chemical modification with APTMS linker molecules, and final surface-tethering of the anti-AFP antibodies (see Methods).<sup>2</sup> Figure SIIa also presents the corresponding contact angle measurements of Si/SiO<sub>2</sub> samples. The surface modifications were developed and characterized using 1 cm x 1 cm samples of silicon substrates decorated with 5 nm SiO<sub>2</sub> (Figure SIIb-c). Figure SIIb presents contact angle measurements for Si/SiO<sub>2</sub> samples post piranha activation, post APTMS modification and surface biofunctionalization with anti-AFP antibodies. The measurements are performed at three locations on the samples with two measurements performed at each location, such that the data points and the error bars reflect the averages and standard deviations, respectively, of six measurements. The contact angle dependency on the various surface modifications follows behavior well documented previously<sup>34</sup>. Figure SIIb also shows ellipsometry measurements performed on the same Si/SiO<sub>2</sub> samples. First, the SiO<sub>2</sub> sample is measured and the 5 nm SiO<sub>2</sub> thickness is validated. Afterwards, the sample is measured post APTMS modification where the SiO<sub>2</sub> is fixed and the APTMS thickness is fitted. Finally, the sample is measured post surface biofunctionalization with anti-AFP antibodies where both the SiO<sub>2</sub> and the APTMS thicknesses are fixed to the measured values and the antibody layer is fitted. The mean square error (MSE) for all measurements is smaller than 2. The thicknesses presented in Figure SIIb reflect the expected values of APTMS and the antibody layer<sup>1,5,6</sup>. Figure SIIc presents the EIS measurements of the imaginary capacitance (C'') vs. the real capacitance (C') for unmodified Si/SiO<sub>2</sub>, post APTMS modification and post biofunctionalization with anti-AFP antibodies. Three distinct curves are shown,

which reflect the effect of the modifications on the sensing area. The capacitance post APTMS modification is not significantly different from the unmodified sample, but the presence of an antibody layer is well reflected in the formation of an additional semi-circle characteristic of the generation of an additional layer. Finally, the biofunctionalization is applied to an MNC biosensor and Figure SI1d shows  $I_{DS}$  vs.  $V_{GL}$  for different  $V_{GF}$  values performed for unmodified, and MNC modified with anti-AFP antibodies. All the measurements are performed for 0.5  $\mu$ L drops of 0.1 mM 7.4 pH PBS solution. Three drops are measured for the unmodified MNC biosensor, and three drops are measured for the modified MNC biosensor, and each drop is measured four times. Figure SI1d presents an excellent robustness and repeatability of a modified MNC device in 0.1 mM 7.4 pH PBS solution, as well as asserts the stability of the quasi-reference electrode under possible drop-to-drop variations<sup>7</sup>. Finally, the repeatability addresses the concern of possible drop-to-drop pH fluctuations<sup>8</sup>.

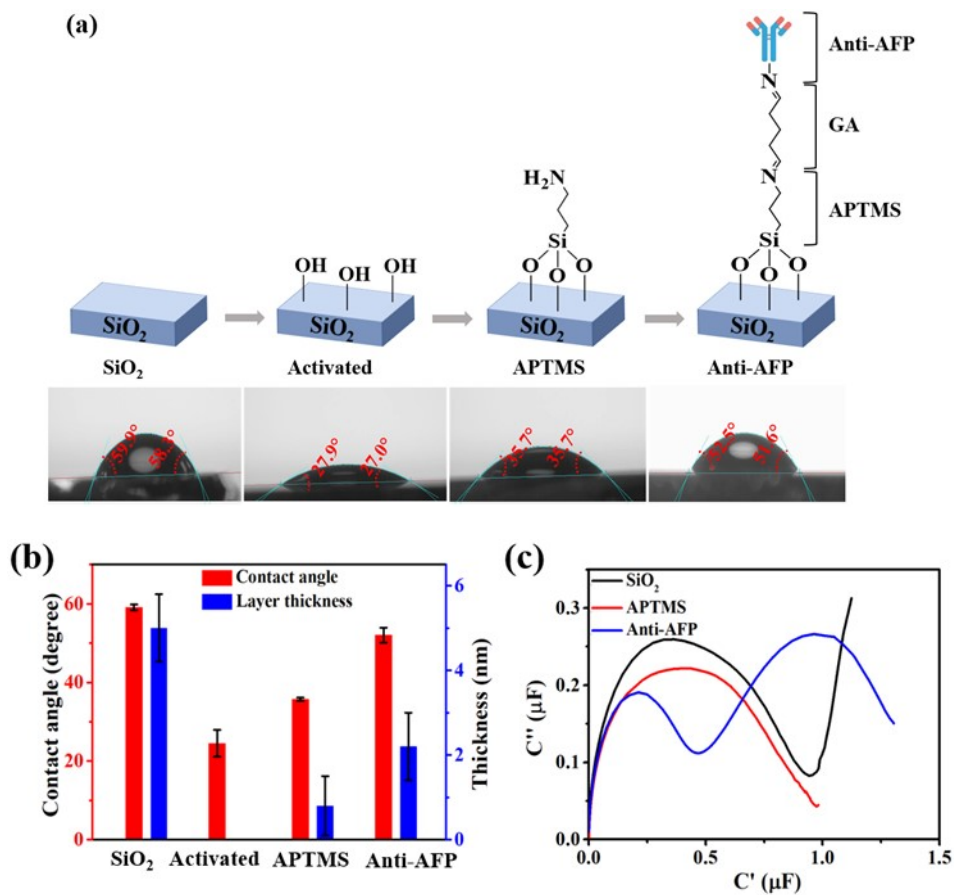

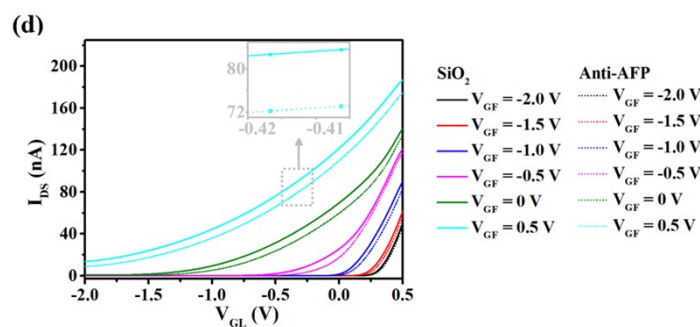

**Figure S11.** (a) An illustration showing the process of Si/SiO<sub>2</sub> surface biofunctionalization. The corresponding contact angle measurements are also shown. (b) Ellipsometry measurements and contact angle measurements of Si/SiO<sub>2</sub> samples post various modification steps. (c) EIS measurements showing the real and imaginary capacitances for the various modifications steps. (d)  $I_{DS}$ - $V_{GL}$  for various  $V_{GF}$  values for unmodified MNC device and biofunctionalized MNC biosensor. The data points and the error bars (see inset) reflect the averages and standard deviations of 12 measurements (3 drops each measured 4 times).

## References

- 1 I. M. Bhattacharyya, I. Ron, A. Chauhan, E. Pikhay, D. Greental, N. Mizrahi, Y. Roizin and G. Shalev, *Nanoscale*, 2022, **14**, 2837–2847.
- 2 S. Samanta, I. M. Bhattacharyya, A. Prajapati, I. Ron, R. Shima-Edelstein, E. Pikhay, D. Greental, A. Eisenberg-Lerner, Z. Rotfogel, Y. Roizin, B. Akabayov and G. Shalev, *Adv Mater Technol*, 2023, **n/a**, 2202200.
- 3 R. G. Frieser, *J Electrochem Soc*, 1974, **121**, 669.
- 4 Z.-Z. Liu, Q. Wang, X. Liu and J.-Q. Bao, *Thin Solid Films*, 2008, **517**, 635–640.
- 5 K. Bierbaum, M. Kinzler, Ch. Woell, M. Grunze, G. Haehner, S. Heid and F. Effenberger, *Langmuir*, 1995, **11**, 512–518.
- 6 I. M. Bhattacharyya, I. Ron, R. Shima-Edelstein, E. Pikhay, Y. Roizin and G. Shalev, *Adv Electron Mater*, 2022, 2200399.

- 7 L. R. F. Allen J. Bard, *Electrochemical Methods: Fundamentals and Applications, 2nd Edition*, John Wiley and Sons Inc., 2008.
- 8 R. E. G. Van Hal, J. C. T. Eijkel and P. Bergveld, *Sensors and Actuators B*, 1995, **24–25**, 201–205.
